# Supplementary material for: Synthesis of shape and size controlled copper indium diselenide (CuInSe2) via extrusion of selenium from 1,2,3-selenadiazole
Source: Royal Society of Chemistry journal article supplement (doi:10.1039/c6ra16933c), 2016-01-01
Supplement: c6ra16933c1.pdf [file c6ra16933c1.pdf]

## Synthesis of Shape and Size Controlled Copper Indium Diselenide (CuInSe<sub>2</sub>) via Extrusion of Selenium from 1, 2, 3-Selenadiazole

Anuraj S. Kshirsagar, Priyesh V. More and Pawan K. Khanna\*

Nano Chemistry and Quantum Dots R & D Lab,

Department of Applied Chemistry, Defence Institute of Advanced Technology (DIAT),

Ministry of Defence, Govt. of India, Girinagar, Pune-411021, India.

\*Corresponding author: pawankhanna2002@yahoo.co.in

### Supplementary Information

**Table S1** Calculated and measured particle size, band gap and lattice strain of as-synthesized ClSe NPs at various reaction conditions.

| Sample                  | Average crystallite size from XRD (nm) | Particle size from Williamson-Hall plot (nm)          | Particle size from particle size analyzer (nm) | Band gap (eV) | Lattice strain from Williamson-Hall plot (Unit x10 <sup>-3</sup> ) |
|-------------------------|----------------------------------------|-------------------------------------------------------|------------------------------------------------|---------------|--------------------------------------------------------------------|
| <b>A)</b>               |                                        | <b>Effect of temperature</b>                          |                                                |               |                                                                    |
| <b>(a)</b> @175°C       | 20                                     | 26                                                    | 12                                             | 1.4           | 0.87                                                               |
| <b>(b)</b> @195°C       | 28                                     | 37                                                    | 15                                             | 1.1           | 1.2                                                                |
| <b>(c)</b> @200°C       | 28                                     | 36                                                    | 10                                             | 1.2           | 0.74                                                               |
| <b>(d)</b> @230°C       | 8                                      | 8.6                                                   | 7                                              | 1.2           | -0.47                                                              |
| <b>(e)</b> @240°C       | 26                                     | 31                                                    | 13                                             | 1.1           | 0.66                                                               |
| <b>(f)</b> @250°C       | 29                                     | 35                                                    | 24                                             | 1.2           | 0.65                                                               |
| <b>B)</b>               |                                        | <b>Effect of amount of OA</b>                         |                                                |               |                                                                    |
| <b>(g)</b> 5 ml OLA     | 26                                     | 35                                                    | 24                                             | 1.1           | 1.3                                                                |
| <b>(h)</b> 10 ml OLA    | 22                                     | 22                                                    | 11                                             | 1.2           | -0.9                                                               |
| <b>(i)</b> 15 ml OLA    | 15                                     | 17                                                    | 9                                              | 1.3           | -1.5                                                               |
| <b>C)</b>               |                                        | <b>Effect of different capping agents and solvent</b> |                                                |               |                                                                    |
| <b>(j)</b> OLA+ DPE     | 24                                     | 26                                                    | 35                                             | 1.4           | -2.7                                                               |
| <b>(k)</b> OLA +DDA +OD | 20                                     | 27                                                    | 11                                             | 1.7           | -0.5                                                               |
| <b>(l)</b> MPA          | 23                                     | 24                                                    | 25                                             | 1.3           | 0.24                                                               |

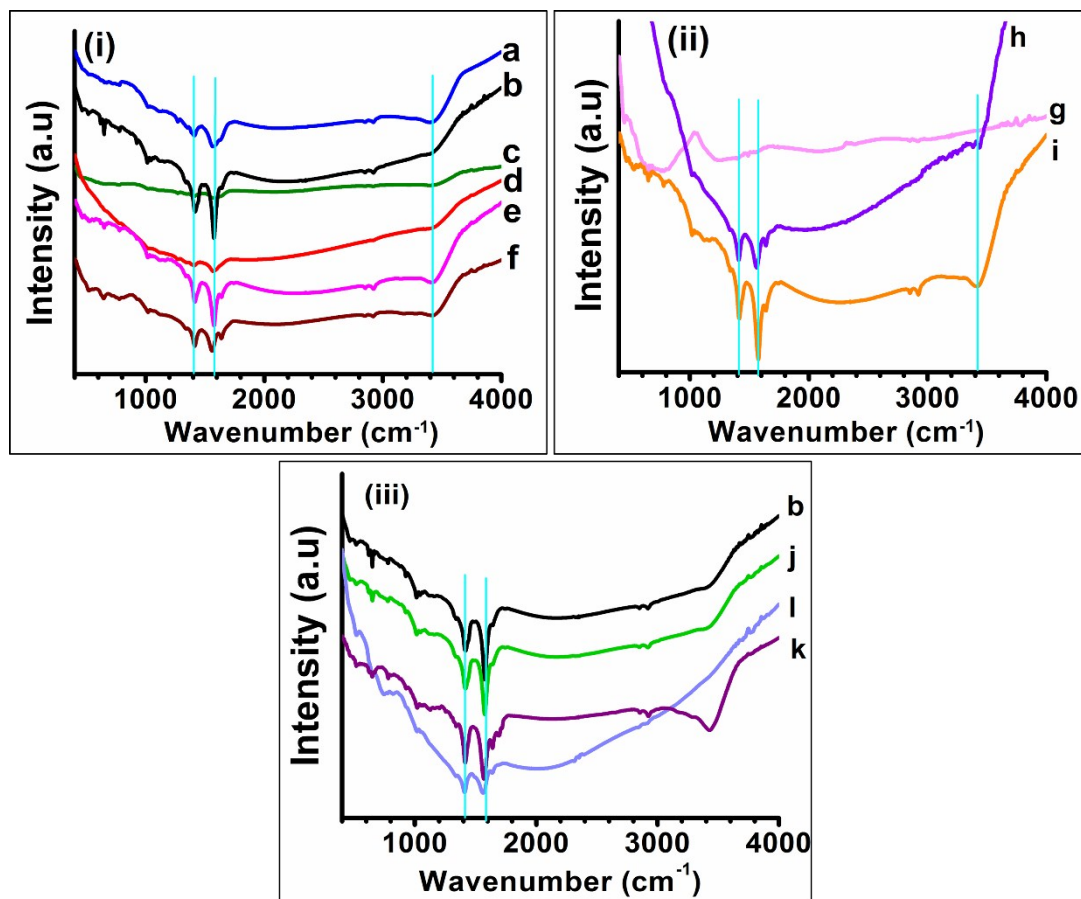

**Fig. S1.** FTIR of CISE NPs (i) synthesized at 175° (a), 195° (b), 200° (c), 230° (d), 240° (e) and 250°C (f); (ii) synthesized using 5 ml (g) OLA, 10 ml OLA (h) and 15 ml OLA (i), (iii) synthesized using OLA+ DPE (j), OLA +DDA +OD (k) and MPA (l).

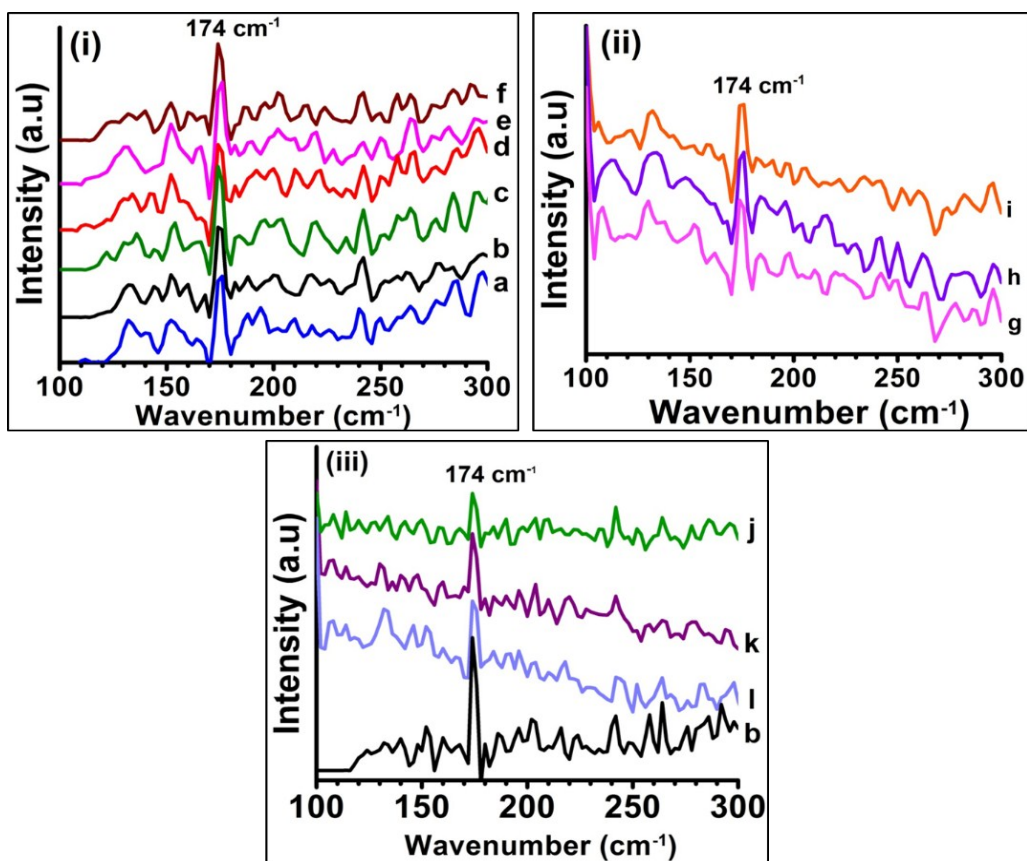

**Fig. S2.** Raman scattering of ClSe NPs (i) synthesized at (a) 175°, (b) 195°, (c) 200°, (d) 230°, (e) 240° and (f) 250°C (ii) synthesized using (g) 5 ml OLA, (h) 10 ml OLA, (i) 15 ml OLA, (iii) synthesized using (j) OLA and DPE, (k) OLA, DDA, OD and (l) MPA.

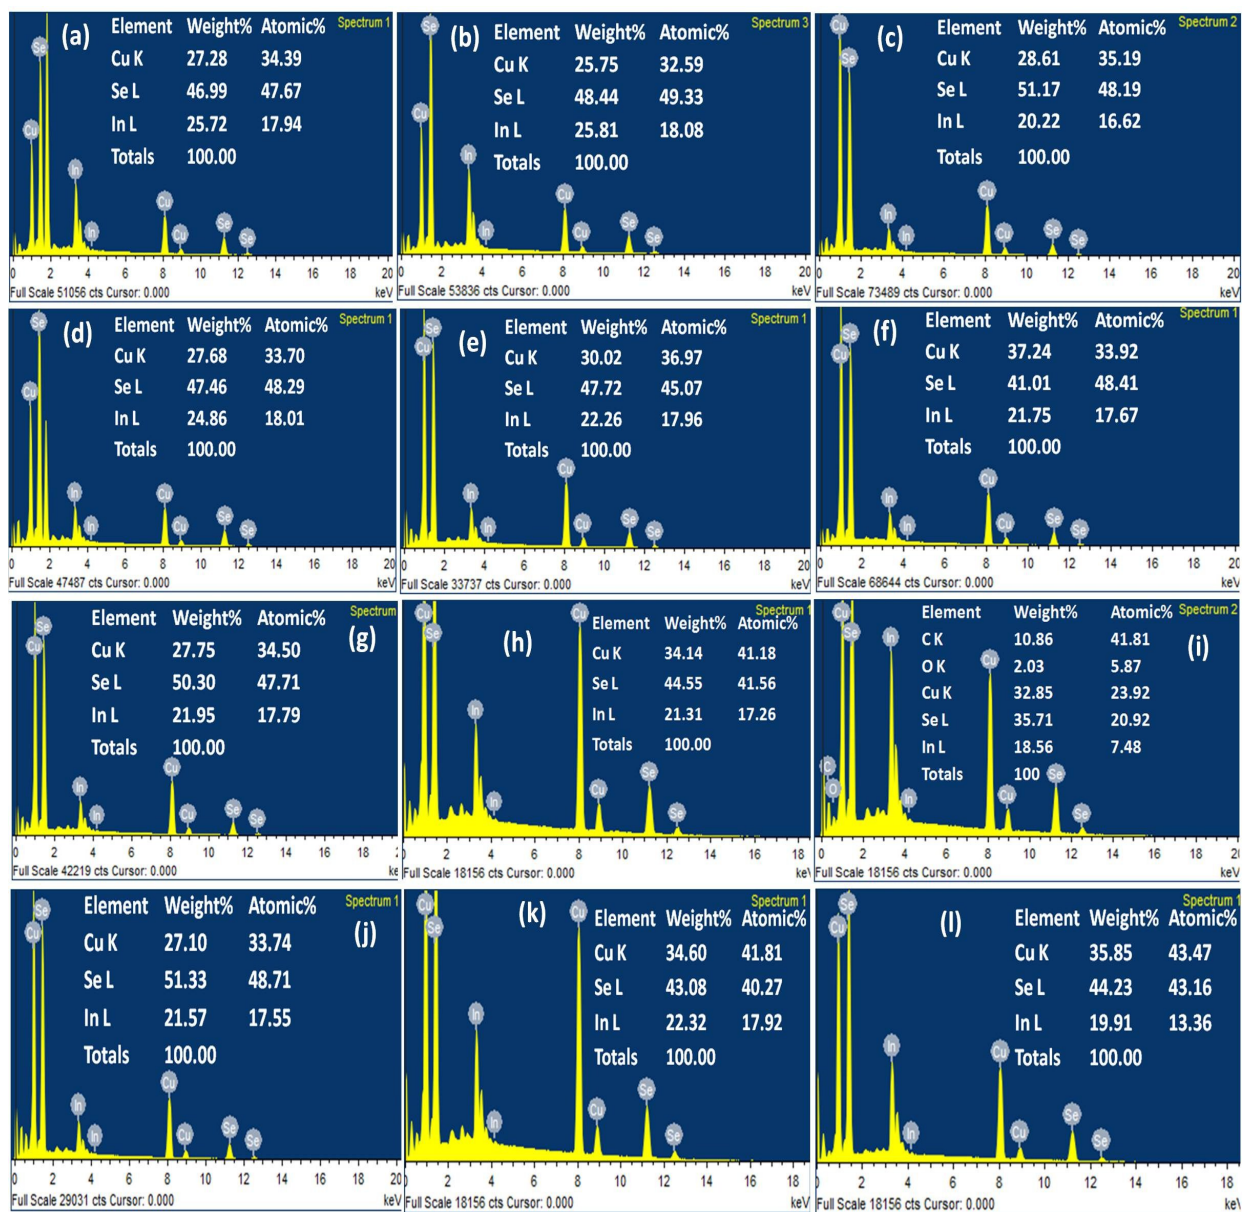

**Fig. S3.** EDAX analysis of ClSe NPs synthesized at various temperatures (a-f), using different concentration of OLA (g-i) and various capping agents (j-l).

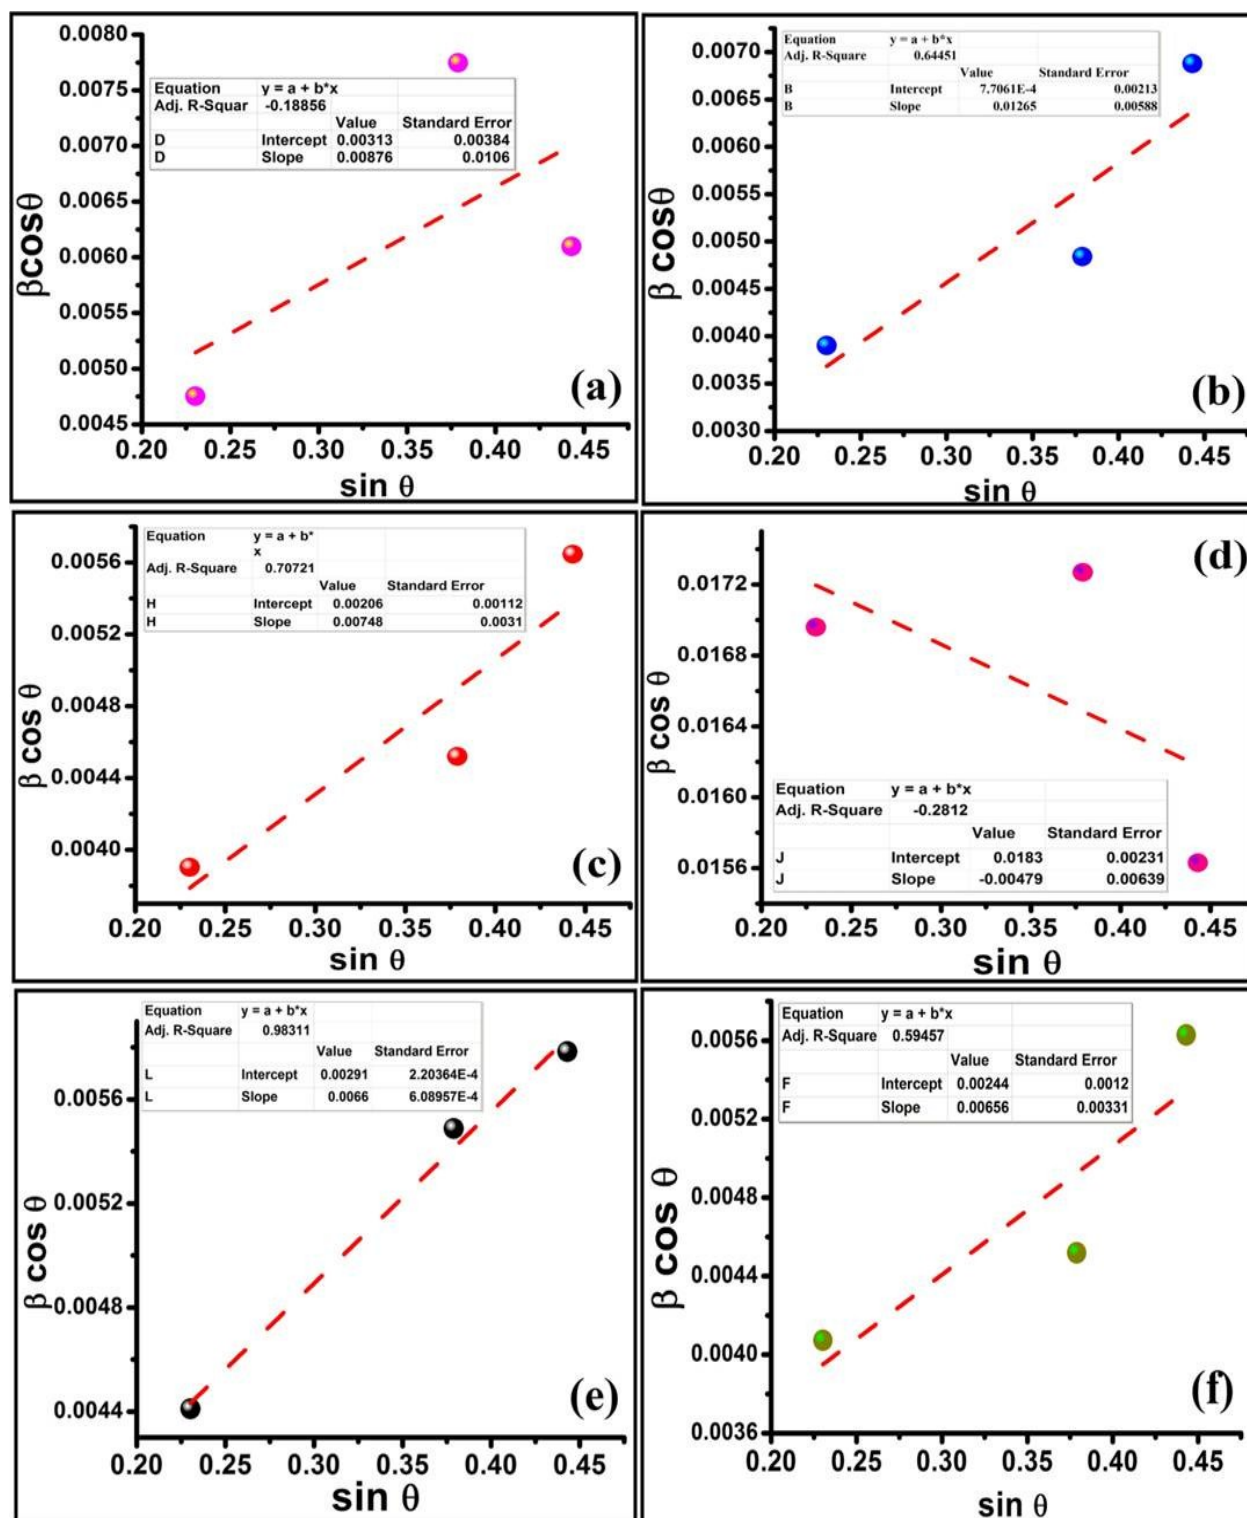

Fig. S4. The W-H analysis assuming UDM of CISE NPs synthesized at various temperatures.

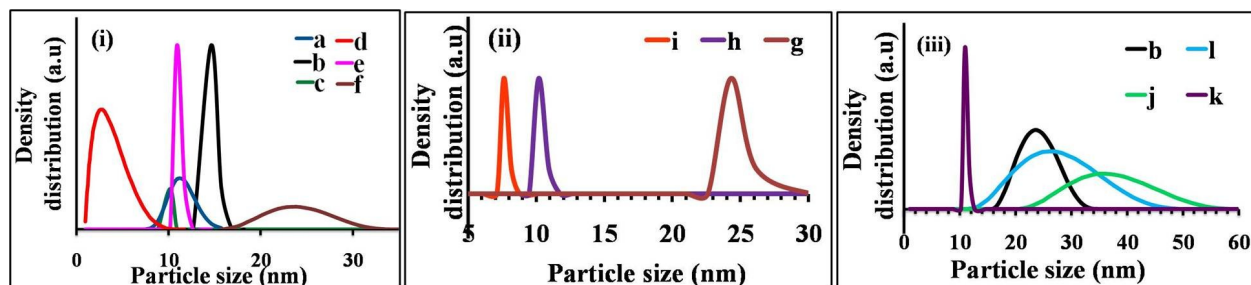

**Fig. S5.** Particle size analyses of as-synthesized ClSe NPs at (i) at various temperature, (ii) using various amount of capping agent and (iii) different capping agents

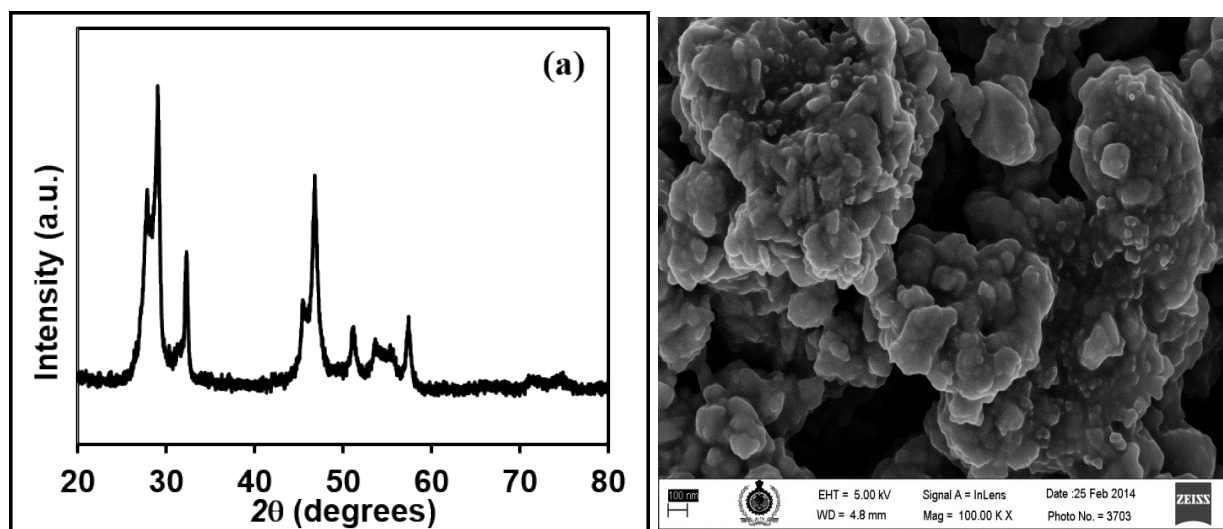

**Fig. S6.** a) XRD and b) SEM image of CuSe NPs synthesized at 155°C.

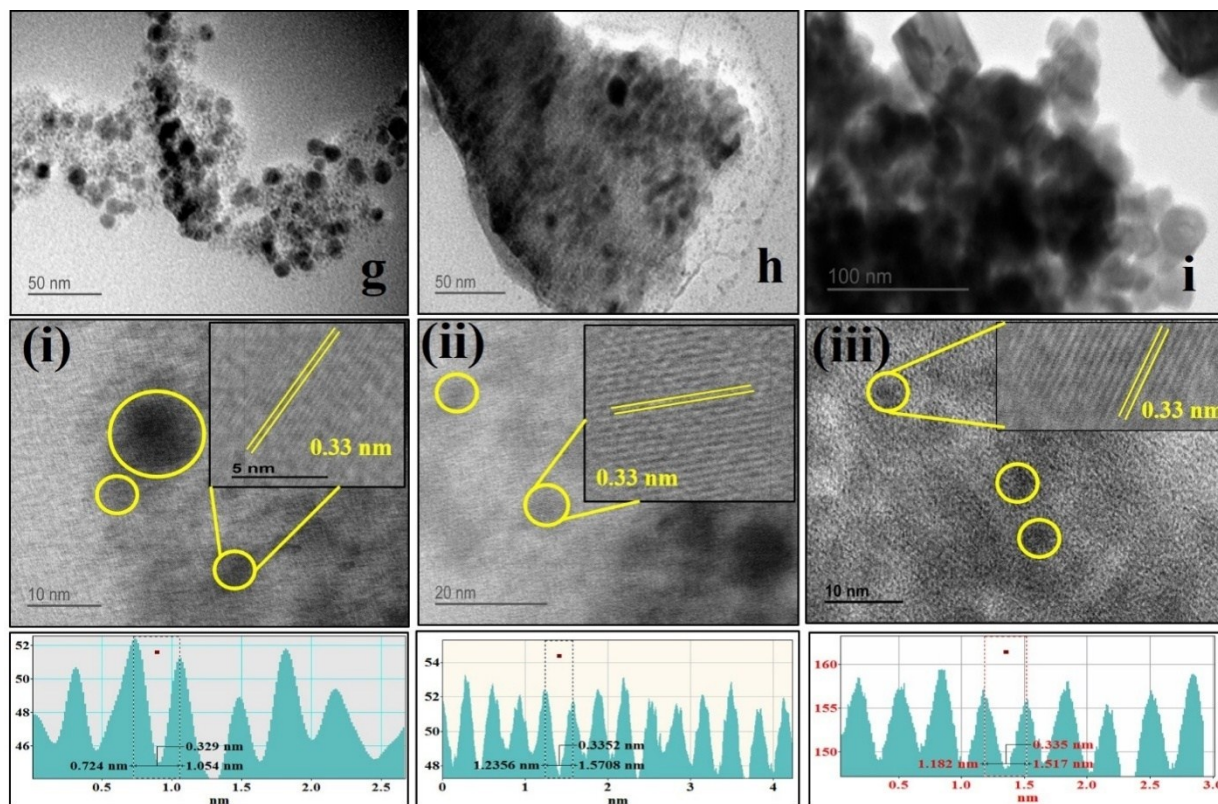

**Fig. S7.** TEM images of ClSe NPs synthesized using 5 ml (g), 10ml (h) and 15ml (i) OLA as capping agent. Figure (i), (ii) and (iii) are HRTEM of (g), (h), (i) respectively. Inset shows lattice fringes of ClSe NPs.

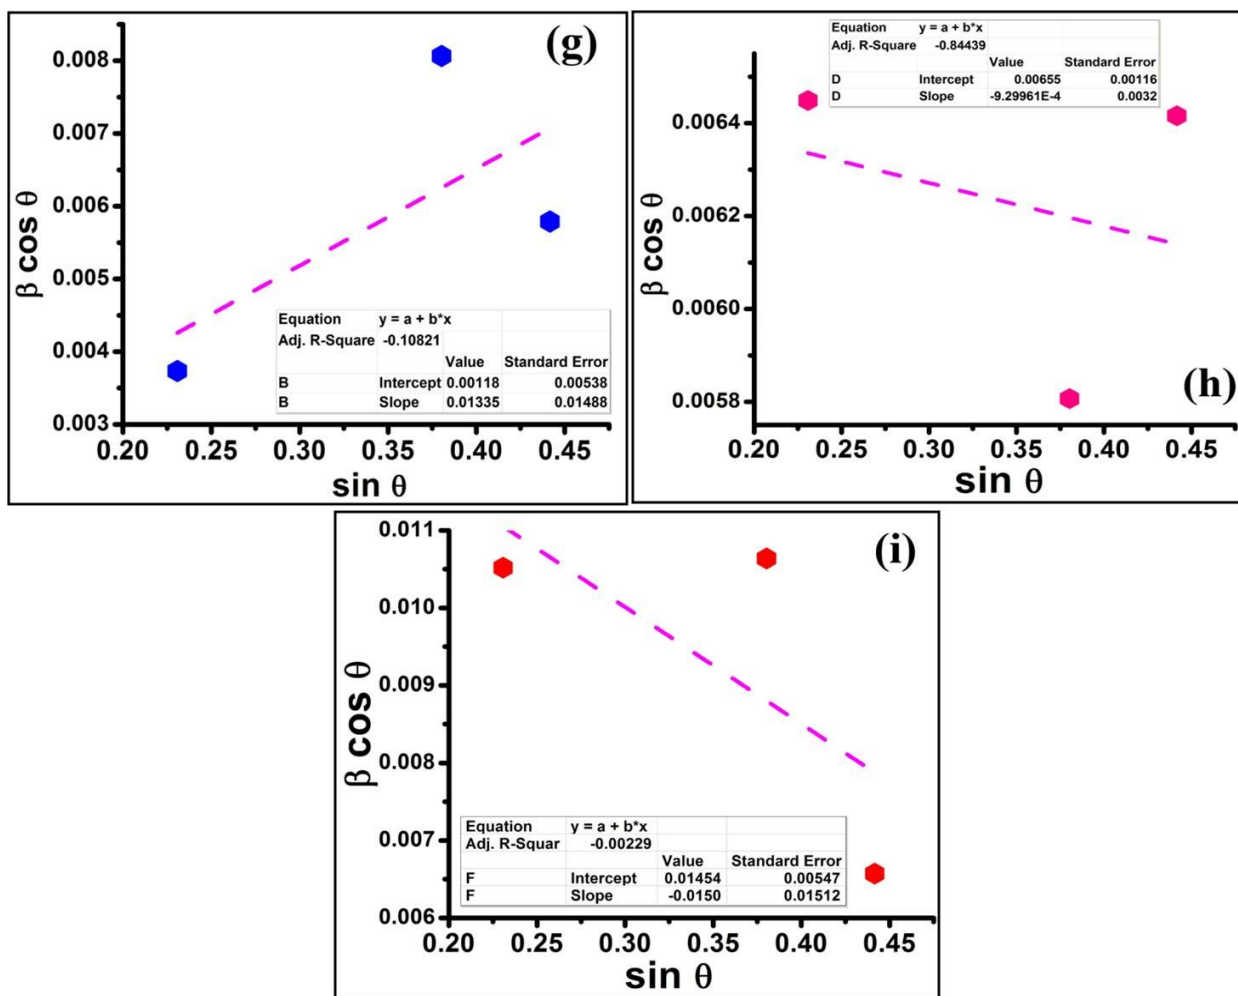

**Fig. S8.** The W-H analysis assuming UDM of CISE NPs synthesized using different concentration of OLA.

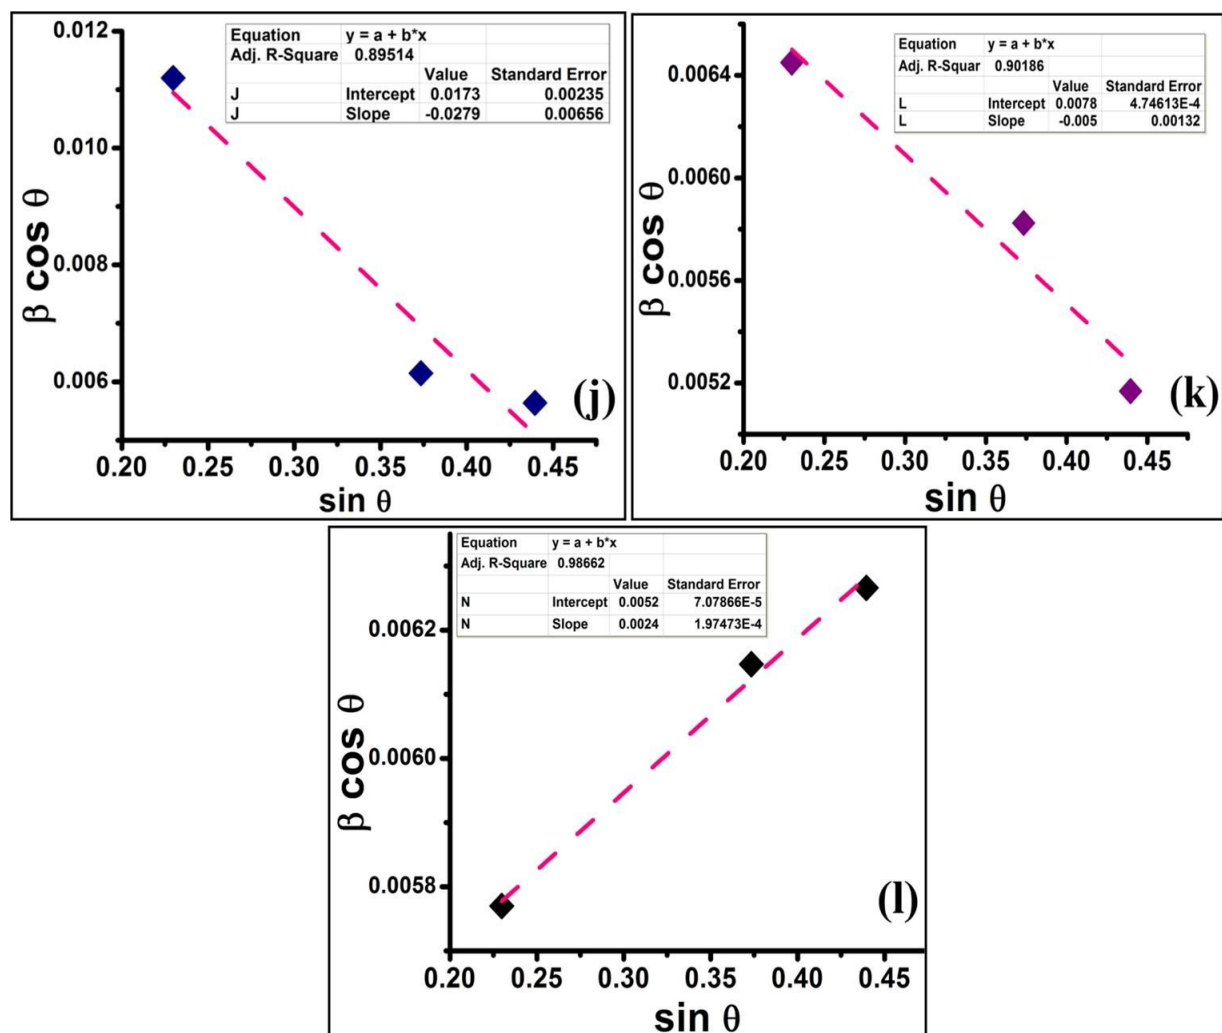

**Fig. S9.** The W-H analysis assuming UDM of CISE NPs synthesized using combination of capping agents.

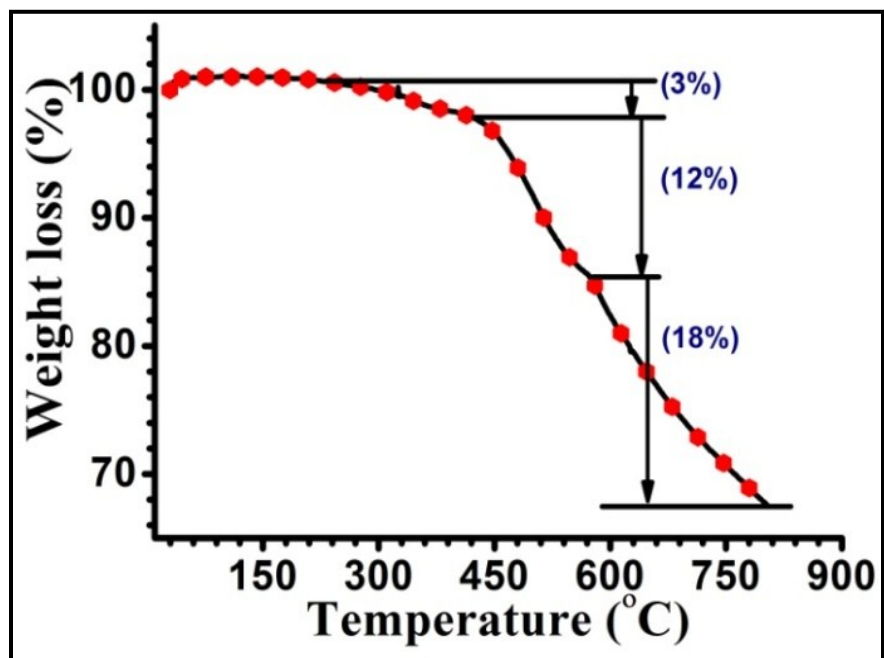

Fig. S10. TGA of oleic acid capped ClSe NPs
